# Supplementary material
Source: publisher figshare collection journal article supplement (https://tandf.figshare.com/ndownloader/files/31581056)
Supplement: Supplementary file 1 [file 31581056]

***Supplementary Information***

***In silico* screening and covalent binding of phytochemicals of *Ocimum sanctum* against SARS-CoV-2 (COVID 19) main protease**

Pranab Kishor Mohapatra1,*, Kumar Sambhav Chopdar2, Ganesh Chandra Dash3, Abhay Kumar Mohanty4, Mukesh Kumar Raval5, #, *

*1. Department of Chemistry, C. V. Raman Global University, Bidyanagar, Mahura, Janla, Bhubaneswar, Odisha 752054, India*

*2. Department of Zoology, Rajendra College, Balangir, Odisha 767002, India*

*3. Department of Chemistry, APS College, Roth, Balangir, Odisha 767061, India*

*4. AI/ML Centre of Excellence, Department of Computer Science and Information Technology, CV Raman Global University, Bidyanagar, Mahura, Janla, Bhubaneswar, Odisha 752054, India*

*5. School of Chemistry, Gangadhar Meher University, Amruta Vihar, Sambalpur, 768004, Odisha, India*

** Authors for Correspondence*

*E-Mail: pranab.mohapatra@cvrgi.edu.in*

*mraval@yahoo.com*


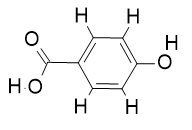


Aesculetin

CID_5281416

4-hydroxybenzoic acid

CID_135

3,4-dihydroxybenzoic acid

CID_72

Apigenin-7-O-glucuronide

CID_5319484

Aesculin

CID_5281417

Apigenin

CID_5280443

Caffeic acid

CID_689043

Chlorogenic Acid CID_1794427

Cirsilineol

CID_162464

Gallic acid

CID_370

Ethyl Gallate

CID_13250

Cynaroside

CID_5280637

Isovitexin

CID_162350

Isoorientin

CID_114776

Luteolin-7-O-glucuronide

CID_13607752

Luteolin

CID_5280445

Molludistin

CID_44258315

Methyl Gallate

CID_7428

Orientin

CID_5281675

Vanillin

CID_1183

UrsolicAcid

CID_64945

Stigmasterol

CID_5280794

Vitexin

CID_5280441

Vicenin 2

CID_442664

Vanillic acid

CID_8468

***Figure S1****. The structural representation phytochemicals in alcoholic extract of leaves and aerial parts of Tulsi. Common names with PubChem ID are mentioned below each structure (http://www.pubchem.ncbi.nlm.nih.gov).*

**Table S1.** Interactions of the best pose of docked ligand (LIG1) luteolin-7-O-glucuronide with the active site of the Mpro. Amino acid residues with sequence number and symbols of interacting atoms are mentioned as per PDB coordinate file

| **Category** | **Type** | **From** | **Chemistry** | **To** | **Chemistry** | **D [Å]** |
| --- | --- | --- | --- | --- | --- | --- |
| HB | Conventional HB | A:CYS145:SG | H-Donor | A:LIG1:O | H-Acceptor | 3.245 |
| HB | Conventional HB | A:LIG1:H | H-Donor | A:LIG1:O | H-Acceptor | 2.300 |
| HB | Conventional HB | A:LIG1:H | H-Donor | A:THR190:O | H-Acceptor | 2.197 |
| HB | Conventional HB | A:LIG1:H | H-Donor | A:THR190:O | H-Acceptor | 2.641 |
| HB | Conventional HB | A:LIG1:H | H-Donor | A:GLN192:O | H-Acceptor | 2.420 |
| HB | Carbon HB | A:PRO168:HD2 | H-Donor | A:LIG1:O | H-Acceptor | 2.725 |
| HB | Pi-Donor HB | A:LIG1:H | H-Donor | A:HIS41 | Pi-Orbitals | 2.716 |
| Hydrophobic | Pi-Pi T-shaped | A:HIS41 | Pi-Orbitals | A:LIG1 | Pi-Orbitals | 5.701 |
| Hydrophobic | Pi-Alkyl | A:LIG1 | Pi-Orbitals | A:MET165 | Alkyl | 4.148 |
| Hydrophobic | Pi-Alkyl | A:LIG1 | Pi-Orbitals | A:MET165 | Alkyl | 4.831 |

A, indicates the chain, HB, Hydrogen bond; D, Distance between interacting atoms.

**Table S2.** Interactions of the best pose of docked Ligand (LIG1) EGCG with the active site of the Mpro. Amino acid residues with sequence number and symbols of interacting atoms are mentioned as per PDB coordinate file

| **Category** | **Type** | **From** | **Chemistry** | **To** | **Chemistry** | **D [Å]** |
| --- | --- | --- | --- | --- | --- | --- |
| HB | Conventional HB | A:GLY143:H | H-Donor | d:LIG1:O2 | H-Acceptor | 2.314 |
| HB | Conventional HB | A:SER144:H | H-Donor | d:LIG1:O2 | H-Acceptor | 3.075 |
| HB | Conventional HB | d:LIG1:H3 | H-Donor | A:ASN142:  OD1 | H-Acceptor | 2.050 |
| HB | Conventional HB | d:LIG1:H4 | H-Donor | A:GLU166:  OE2 | H-Acceptor | 1.877 |
| HB | Conventional HB | d:LIG1:HO6 | H-Donor | A:THR26:O | H-Acceptor | 2.323 |
| HB | Conventional HB | d:LIG1:H9 | H-Donor | A:GLN189:  OE1 | H-Acceptor | 2.804 |
| HB | Carbon HB | A:GLY143:HA1 | H-Donor | d:LIG1:O7 | H-Acceptor | 2.776 |
| HB | Carbon HB | A:HIS172:HD2 | H-Donor | d:LIG1:O5 | H-Acceptor | 2.659 |
| Other | Pi-Sulfur | A:CYS145:SG | Sulfur | d:LIG1 | Pi-Orbitals | 5.799 |
| Hydrophobic | Pi-Pi T-shaped | A:HIS41 | Pi-Orbitals | d:LIG1 | Pi-Orbitals | 4.667 |
| Hydrophobic | Amide-Pi Stacked | A:LEU141:C,O;  ASN142:N | Amide | d:LIG1 | Pi-Orbitals | 3.732 |
| Hydrophobic | Pi-Alkyl | d:LIG1 | Pi-Orbitals | A:MET49 | Alkyl | 5.150 |

A, indicates the chain. HB, Hydrogen bond; D, Distance between interacting atoms.

**Table S3.** Interactions of the best pose of docked Ligand (O6K) with the active site of the Mpro. Amino acid residues with sequence number and symbols of interacting atoms are mentioned as per PDB coordinate file

| **Category** | **Type** | **From** | **Chemistry** | **To** | **Chemistry** | **D [Å]** |
| --- | --- | --- | --- | --- | --- | --- |
| HB | Conventional HB | A:CYS145:H | H-Donor | C:O6K502:O40 | H-Acceptor | 2.186 |
| HB | Conventional HB | A:HIS163:HE2 | H-Donor | C:O6K502:O48 | H-Acceptor | 1.934 |
| HB | Conventional HB | A:GLU166:H | H-Donor | C:O6K502:O22 | H-Acceptor | 2.042 |
| HB | Conventional HB | C:O6K502:HN2 | H-Donor | A:GLU166:O | H-Acceptor | 2.815 |
| HB | Conventional HB | C:O6K502:H38 | H-Donor | A:HIS164:O | H-Acceptor | 2.067 |
| HB | Conventional HB | C:O6K502:H49 | H-Donor | A:PHE140:O | H-Acceptor | 2.202 |
| HB | Conventional HB | C:O6K502:H49 | H-Donor | A:GLU166:OE1 | H-Acceptor | 3.062 |
| HB | Conventional HB | C:O6K502:H36 | H-Donor | A:ASN142:OD1 | H-Acceptor | 2.502 |
| HB | Carbon HB | A:HIS41:HD2 | H-Donor | C:O6K502:O41 | H-Acceptor | 2.700 |
| HB | Carbon HB | A:MET165:HA | H-Donor | C:O6K502:O22 | H-Acceptor | 2.742 |
| HB | Carbon HB | C:O6K502:H20 | H-Donor | A:HIS164:O | H-Acceptor | 2.690 |
| HB | Carbon HB | C:O6K502:H40 | H-Donor | A:ASN142:OD1 | H-Acceptor | 2.698 |
| HB | Carbon HB | C:O6K502:H511 | H-Donor | A:PHE140:O | H-Acceptor | 2.971 |
| HB | Carbon HB | C:O6K502:H512 | H-Donor | A:GLU166:OE1 | H-Acceptor | 3.044 |
| HB | Carbon HB | C:O6K502:H57 | H-Donor | A:ASN142:OD1 | H-Acceptor | 3.006 |
| HB | Carbon HB | C:O6K502:H131 | H-Donor | A:THR26:O | H-Acceptor | 2.873 |
| HB | Carbon HB | C:O6K502:H132 | H-Donor | A:THR26:O | H-Acceptor | 3.023 |
| Hydrophobic | Alkyl | C:O6K502:C31 | Alkyl | A:PRO168 | Alkyl | 3.909 |
| Hydrophobic | Alkyl | C:O6K502 | Alkyl | A:MET165 | Alkyl | 4.604 |
| Hydrophobic | Pi-Alkyl | A:HIS41 | Pi-Orbitals | C:O6K502 | Alkyl | 4.534 |
| Hydrophobic | Pi-Alkyl | C:O6K502 | Pi-Orbitals | A:MET165 | Alkyl | 5.044 |

A, C, indicate the chains, HB, Hydrogen bond; D, Distance between interacting atoms.

**Table S4**. Details of the interactions of Covalent Ligand (LIG1) luteolin-7-O-glucuronide with the active site of the Mpro.

| Category | Types | From | Chemistry | To | Chemistry | D [Å] |
| --- | --- | --- | --- | --- | --- | --- |
| HB | Conventional HB | A:HIS41:HD1 | H-Donor | LIG1:O10 | H-Acceptor | 2.201 |
| HB | Conventional HB | A:HIS172:HE2 | H-Donor | LIG1:O4 | H-Acceptor | 2.185 |
| HB | Conventional HB | LIG1:H3 | H-Donor | A:GLU166:OE1 | H-Acceptor | 1.739 |
| HB | Conventional HB | LIG1:H4 | H-Donor | A:GLU166:OE1 | H-Acceptor | 1.674 |
| HB | Conventional HB | LIG1:H5 | H-Donor | A:LEU141:O | H-Acceptor | 2.289 |
| HB | Conventional HB | LIG1:H9 | H-Donor | A:ARG188:O | H-Acceptor | 2.859 |
| HB | Conventional HB | LIG1:H10 | H-Donor | A:TYR54:OH | H-Acceptor | 2.041 |
| HB | Conventional HB | LIG1:H10 | H-Donor | A:ASP187:O | H-Acceptor | 2.307 |
| HB | Conventional HB | A:CYS145:HA | H-Donor | A:HIS163:O | H-Acceptor | 2.503 |
| HB | Conventional HB | LIG1:H1 | H-Donor | A:GLN189:OE1 | H-Acceptor | 2.732 |
| Electrostatic | Pi-Cation | A:HIS41:NE2 | Positive | LIG1 | Pi-Orbitals | 4.451 |
| Other | Pi-Sulfur | A:CYS145:SG | Sulfur | A:HIS163 | Pi-Orbitals | 3.731 |
| Hydrophobic | Pi-Pi T-shaped | LIG1 | Pi-Orbitals | LIG1 | Pi-Orbitals | 5.056 |
| Hydrophobic | Pi-Alkyl | A:HIS41 | Pi-Orbitals | LIG1 | Alkyl | 5.245 |
| Hydrophobic | Pi-Alkyl | LIG1 | Pi-Orbitals | A:MET165 | Alkyl | 5.342 |

A, indicate the chains, HB, Hydrogen bond; D, Distance between interacting atoms.

**Table S5.** Details of the interactions of Covalent Ligand (LIG1) EGCG with the active site of the Mpro.

| **Category** | **Type** | **From** | **Chemistry** | **To** | **Chemistry** | **D [Å]** |
| --- | --- | --- | --- | --- | --- | --- |
| HB | Conventional HB | A:HIS41:HD1 | H-Donor | d:LIG1:O10 | H-Acceptor | 2.201 |
| HB | Conventional HB | A:HIS172:HE2 | H-Donor | d:LIG1:O4 | H-Acceptor | 2.185 |
| HB | Conventional HB | d:LIG1:H3 | H-Donor | A:GLU166:OE1 | H-Acceptor | 1.739 |
| HB | Conventional HB | d:LIG1:H4 | H-Donor | A:GLU166:OE1 | H-Acceptor | 1.674 |
| HB | Conventional HB | d:LIG1:H5 | H-Donor | A:LEU141:O | H-Acceptor | 2.289 |
| HB | Conventional HB | d:LIG1:H9 | H-Donor | A:ARG188:O | H-Acceptor | 2.859 |
| HB | Conventional HB | d:LIG1:H10 | H-Donor | A:TYR54:OH | H-Acceptor | 2.041 |
| HB | Conventional HB | d:LIG1:H10 | H-Donor | A:ASP187:O | H-Acceptor | 2.307 |
| HB | Carbon HB | A:CYS145:HA | H-Donor | A:HIS163:O | H-Acceptor | 2.503 |
| HB | Carbon HB | d:LIG1:H1 | H-Donor | A:GLN189:OE1 | H-Acceptor | 2.732 |
| Electrostatic | Pi-Cation | A:HIS41:NE2 | Positive | d:LIG1 | Pi-Orbitals | 4.451 |
| Other | Pi-Sulfur | A:CYS145:SG | Sulfur | A:HIS163 | Pi-Orbitals | 3.731 |
| Hydrophobic | Pi-Pi T-shaped | d:LIG1 | Pi-Orbitals | d:LIG1 | Pi-Orbitals | 5.056 |
| Hydrophobic | Pi-Alkyl | A:HIS41 | Pi-Orbitals | d:LIG1 | Alkyl | 5.245 |
| Hydrophobic | Pi-Alkyl | d:LIG1 | Pi-Orbitals | A:MET165 | Alkyl | 5.342 |

A, d, indicate the chains, HB, Hydrogen bond; D, Distance between interacting atoms.

**Table S6.** Details of the interactions of Covalent Ligand (LIG1) EGCG with the active site of the Mpro.

| **Category** | **Type** | **From** | **Chemistry** | **To** | **Chemistry** | **D [Å]** |
| --- | --- | --- | --- | --- | --- | --- |
| HB | Conventional HB | A:ASN28:H | H-Donor | A:CYS145:O | H-Acceptor | 2.057 |
| HB | Conventional HB | A:ASN28:HD22 | H-Donor | A:CYS145:O | H-Acceptor | 1.980 |
| HB | Conventional HB | A:GLY143:H | H-Donor | C:O6K502:O41 | H-Acceptor | 1.888 |
| HB | Conventional HB | A:SER144:H | H-Donor | C:O6K502:O41 | H-Acceptor | 2.773 |
| HB | Conventional HB | A:CYS145:H | H-Donor | C:O6K502:O41 | H-Acceptor | 2.062 |
| HB | Conventional HB | A:GLU166:H | H-Donor | C:O6K502:O22 | H-Acceptor | 1.892 |
| HB | Conventional HB | C:O6K502:HN2 | H-Donor | A:GLU166:O | H-Acceptor | 2.166 |
| HB | Conventional HB | C:O6K502:H38 | H-Donor | A:HIS164:O | H-Acceptor | 1.841 |
| HB | Conventional HB | C:O6K502:H49 | H-Donor | A:PHE140:O | H-Acceptor | 2.435 |
| HB | Conventional HB | C:O6K502:H49 | H-Donor | A:GLU166:OE2 | H-Acceptor | 2.553 |
| HB | Conventional HB | C:O6K502:HO4 | H-Donor | A:HIS41:NE2 | H-Acceptor | 2.385 |
| HB | Carbon HB | A:CYS145:HA | H-Donor | A:HIS163:O | H-Acceptor | 2.689 |
| HB | Carbon HB | A:MET165:HA | H-Donor | C:O6K502:O22 | H-Acceptor | 2.804 |
| HB | Carbon HB | A:HIS172:HD2 | H-Donor | C:O6K502:O48 | H-Acceptor | 2.720 |
| HB | Carbon HB | C:O6K502:H20 | H-Donor | A:HIS164:O | H-Acceptor | 2.775 |
| HB | Carbon HB | C:O6K502:H511 | H-Donor | A:ASN142:OD1 | H-Acceptor | 2.982 |
| HB | Carbon HB | C:O6K502:H131 | H-Donor | A:THR26:O | H-Acceptor | 2.873 |
| Hydrogen Bond | Carbon HB | C:O6K502:H132 | H-Donor | A:THR26:O | H-Acceptor | 3.023 |
| Other | Pi-Sulfur | A:CYS145:SG | Sulfur | A:HIS41 | Pi-Orbitals | 4.529 |
| Hydrophobic | Alkyl | A:CYS145 | Alkyl | A:LEU27 | Alkyl | 5.108 |
| Hydrophobic | Alkyl | A:CYS145 | Alkyl | A:PRO39 | Alkyl | 5.176 |
| Hydrophobic | Alkyl | C:O6K502 | Alkyl | A:MET165 | Alkyl | 5.022 |
| Hydrophobic | Pi-Alkyl | A:HIS41 | Pi-Orbitals | C:O6K502 | Alkyl | 4.274 |
| Hydrophobic | Pi-Alkyl | A:HIS163 | Pi-Orbitals | A:CYS145 | Alkyl | 5.440 |

A, C, indicate the chains, HB, Hydrogen bond; D, Distance between interacting atoms.

**Number of hydrogen bonds**

**A**

**B**

**C**

***Figure S2****. Number of hydrogen bonds formed by the residues of the protein with ligands (A) luteolin-7-O-glucuronide (average 3.28) (B) EGCG (average 2.87) (C) O6K (average 4.39), during molecular dynamic simulations for 100 ns.*

**A**

**B**

**C**

***Figure S3.*** *Dynamic cross-correlation matrix (DCCM) of the protein with ligands (A) luteolin-7-O-glucuronide (B) EGCG (C) O6K, during molecular dynamic simulations for 100 ns. The DCCM is visualized with colors ranging from blue (-1, fully anti-correlated) to yellow (+1, fully correlated).*

**A**

**C**


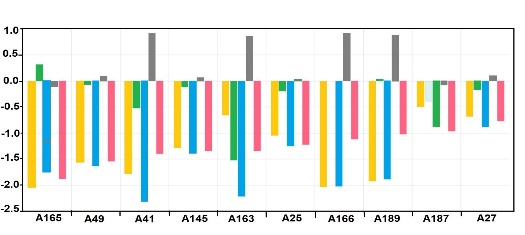


**B**

**C**

***Figure S4.*** *Energy decompose of protein-ligand complex in kcal/mol. A, Luteolin-7-O-glucuronide; B, EGCG; C, O6K. Color codes of energies are depicted at the end of the figure.*
